# Supplementary material for: Tumor suppressor p53 mediates interleukin-6 expression to enable cancer cell evasion of genotoxic stress
Source: PubMed Central journal article supplement (PMC10495329; doi:10.1038/s41420-023-01638-0), 2023-09-11
Supplement: 41420_2023_1638_MOESM1_ESM.pdf [file 41420_2023_1638_MOESM1_ESM.pdf]

# Supplementary Information

## Tumor Suppressor p53 Mediates Interleukin-6 Expression to Enable Cancer Cell Evasion of Genotoxic Stress

Trinh T. T. Phan<sup>1,†</sup>, Nam V. Truong<sup>2,†</sup>, Wen-Guey Wu<sup>2</sup>, Yi-Chun Su<sup>1</sup>, Tzu-Sheng Hsu<sup>1,\*</sup>,  
and Lih-Yuan Lin<sup>1,\*</sup>

<sup>1</sup> Institute of Molecular and Cellular Biology, College of Life Sciences and Medicine, National Tsing Hua University, Hsinchu 300044, Taiwan R.O.C

<sup>2</sup> Institute of Bioinformatics and Structural Biology, College of Life Sciences and Medicine, National Tsing Hua University, Hsinchu 300044, Taiwan R.O.C

† These authors contributed equally to this work.

**\*Corresponding authors:** Lih-Yuan Lin, Tzu-Sheng Hsu

**Email:** [lylin@life.nthu.edu.tw](mailto:lylin@life.nthu.edu.tw) (LYL), [tshsu@life.nthu.edu.tw](mailto:tshsu@life.nthu.edu.tw) (TSH)

### This PDF file includes:

Supplementary Figure Legends

Supplementary Tables S1 to S5

## Supplementary Figure Legends

**Fig. S1 IL-6 is induced by genotoxic stress and drives cancer cell tolerance to genotoxic treatments.** **A-C** IL-6 gene expression in A549 or H1299 cells treated with increasing concentrations of (A) sodium arsenite (SA), (B) doxorubicin (Dox), or (C) cisplatin (CisPt) for 24 h was measured by quantitative real-time PCR (qRT-PCR). **D** IL-6 mRNA levels in primary human liposarcoma cell cultures were analyzed using the GSE12972 dataset and their  $\log_2$ -transformed values were compared between control (n = 19) and paired Dox-treated (n = 19) cells. **E** The concentration of IL-6 present in the culture supernatants of A549 or H1299 cells treated with the indicated concentrations of CisPt for 24 h was determined by ELISA. **F, G** Flow cytometric analysis of the cell surface expression of IL-6R $\alpha$  in A549 cells treated with increasing concentrations of (F) SA or (G) CisPt for 24 h. Cells were stained with PE-conjugated antibody against IL-6R $\alpha$ . **H** IL-6 gene expression in control (scramble) and IL-6-silenced (shIL-6-1 and shIL-6-2) A549 cells untreated or treated with 20  $\mu$ M SA for 24 h was measured by qRT-PCR. **I** IL-6 protein concentration in the culture supernatants of scramble, shIL-6-1, and shIL-6-2 A549 cells untreated or treated with 20  $\mu$ M SA for 24 h was determined by ELISA. **J** IL-6 gene expression in control (siCtrl) and IL-6-silenced (siIL-6) A549 cells untreated or treated with 20  $\mu$ M SA, 0.5  $\mu$ M Dox, or 20  $\mu$ M CisPt for 24 h was measured by qRT-PCR. **K** IL-6 protein concentration in the culture supernatants of siCtrl and siIL-6 A549 cells untreated or treated with 20  $\mu$ M SA, 0.5  $\mu$ M Dox, or 20  $\mu$ M CisPt for 24 h was determined by ELISA. **L** Dose-response curves showing the survival of siCtrl and siIL-6 A549 cells in response to increasing concentrations of CisPt treatment for 24 h. **M** The IC<sub>50</sub> values of CisPt against siCtrl and siIL-6 A549 cells were calculated from the nonlinear regression curves in Fig. S1L. Cell viability was measured by MTT assays. Error bars represent mean  $\pm$  SD, n = 3. Statistical analysis was performed using unpaired two-tailed Student's *t*-test (A-C, E-G, M), paired two-tailed Student's *t*-test (D), or two-way ANOVA with Tukey's multiple comparisons test (H-K). \**p*  $\leq$  0.05; \*\**p*  $\leq$  0.01; \*\*\**p*  $\leq$  0.001; ns, not significant.

**Fig. S2 IL-6 silencing heightens genotoxic stress-induced cell death in human breast cancer MCF-7 and cervical cancer HeLa cells.** **A, H** IL-6 gene expression in control (siCtrl) and IL-6-silenced (siIL-6) (A) MCF-7 or (H) HeLa cells untreated or treated with 20  $\mu$ M SA, 0.5  $\mu$ M Dox, or 20  $\mu$ M CisPt for 24 h was measured by qRT-PCR. **B, D, F, I, K, M** Dose-response curves showing the survival of siCtrl and siIL-6 (B, D, F) MCF-7 or (I, K, M) HeLa cells in response to increasing concentrations of (B, I) SA, (D, K) Dox, or (F, M) CisPt treatment for 24 h. **C, E, G, J, L, N** The IC<sub>50</sub> values of (C, J) SA, (E, L) Dox, or (G, N) CisPt against siCtrl and siIL-6 (C, E, G) MCF-7 or (J, L, N) HeLa cells were calculated from the nonlinear regression curves in Fig. S2B, D, F, I, K, M, respectively. Cell viability was measured by MTT assays. Error bars represent mean  $\pm$  SD, n = 3. Statistical analysis was performed using two-way ANOVA with Tukey's multiple comparisons test (A, H) or unpaired two-tailed Student's *t*-test (C, E, G, J, L, N). \**p*  $\leq$  0.05; \*\**p*  $\leq$  0.01; \*\*\**p*  $\leq$  0.001.

**Fig. S3 IL-6 mitigates genotoxic stress-induced cell death.** **A, C, E** Dose-response curves showing the survival of control and 50 or 20 ng/ml IL-6-pretreated (A) A549 or (C, E) H1299 cells, respectively, in response to increasing concentrations of (A, C) SA or (E) CisPt treatment for 24 h. **B, D, F** The IC<sub>50</sub> values of (B, D) SA or (F) CisPt against control and 50 or 20 ng/ml IL-6-pretreated (B) A549 or (D, F) H1299 cells were calculated from the nonlinear regression curves in Fig. S3A, C, E, respectively. **G, I** Dose-response curves showing the survival of siCtrl, siIL-6, and siIL-6+IL-6 A549 cells in response to increasing concentrations of (G) SA or (I) Dox treatment for 24 h. **H, J** The IC<sub>50</sub> values of (H) SA or (J) Dox against siCtrl, siIL-6, and siIL-6+IL-6 A549 cells were calculated from the nonlinear regression curves in Fig. S3G and S3I, respectively. Cell viability was measured by MTT assays. **K-M** The mRNA levels of the anti-apoptotic genes (K)

Bcl-xL, (L) Mcl-1, and (M) Bcl-2 in A549 cells treated with increasing concentrations of SA for 24 h were measured by qRT-PCR. **N** The proliferation of scramble, shIL-6-1, and shIL-6-2 A549 cells untreated or treated with 20  $\mu$ M SA for 24 h was assessed by manual cell counting with a hemocytometer. Error bars represent mean  $\pm$  SD, n = 3. Statistical analysis was performed using unpaired two-tailed Student's *t*-test (B, D, F, K-M) or one-way ANOVA with Tukey's multiple comparisons test (H, J). \**p*  $\leq$  0.05; \*\**p*  $\leq$  0.01; \*\*\**p*  $\leq$  0.001; ns, not significant.

**Fig. S4 p53 silencing attenuates IL-6 expression.** qRT-PCR analysis of (A, C) p53 and (B, D) IL-6 gene expressions in control (siCtrl) and p53-silenced (sip53) (A, B) MCF-7 or (C, D) HeLa cells untreated or treated with 0.5  $\mu$ M Dox for 24 h. Error bars represent mean  $\pm$  SD, n = 3. Statistical analysis was performed using two-way ANOVA with Tukey's multiple comparisons test. \**p*  $\leq$  0.05; \*\**p*  $\leq$  0.01; \*\*\**p*  $\leq$  0.001; ns, not significant.

**Fig. S5 Genotoxic-treated cancer cells secrete IL-6 to enable alternative (M2) macrophage polarization.** **A** THP-1 monocytes were differentiated into M0 macrophages by treatment with 10 ng/ml PMA for 24 h followed by culture in serum-free RPMI medium for an additional 24 h and M0 macrophages were then stimulated with conditioned media from untreated or SA/Dox-treated A549 cells to induce macrophage polarization as depicted. **B** Phase-contrast imaging of THP-1 monocytes and 10 ng/ml PMA-primed macrophages before and after being cultured in serum-free RPMI medium for 24 h. Scale bar: 100  $\mu$ m. **C-F** The mRNA levels of the macrophage markers (C) CD14, (D) CD68, (E) IL-1 $\beta$ , and (F) TNF- $\alpha$  were analyzed in THP-1 monocytes and THP-1-derived M0 macrophages using qRT-PCR. **G** Flow cytometric analysis of the cell surface expression of the macrophage marker CD14 in THP-1 monocytes and THP-1-derived M0 macrophages. Cells were stained with PE-conjugated antibody against CD14. **H-J** The mRNA

levels of (H, I) M2- (CD206 and CD163) or (J) M1-associated (CD80) macrophage markers were analyzed in THP-1-derived macrophages co-cultured with RPMI, control (scramble), or IL-6-silenced (shIL-6-1 and shIL-6-2) A549 cells with and without 20  $\mu$ M SA or 0.1  $\mu$ M Dox treatment for 24 h using qRT-PCR. Error bars represent mean  $\pm$  SD, n = 3. Statistical analysis was performed using unpaired two-tailed Student's *t*-test (C-G) or two-way ANOVA with Tukey's multiple comparisons test (H-J). \**p*  $\leq$  0.05; \*\**p*  $\leq$  0.01; \*\*\**p*  $\leq$  0.001; ns, not significant.

**Fig. S6 IL-6 expression in SA-treated A549 cells after SA removal and IL-6 concentration in macrophage-stimulating conditioned media.** **A** qRT-PCR analysis of IL-6 mRNA levels in A549 cells after being treated with 20  $\mu$ M SA for 24 h and cultured in SA-free RPMI medium for the indicated time periods (1, 3, 6, 12, and 24 h). **B** The concentration of IL-6 present in the culture supernatants of A549 cells after being treated with SA (20 or 40  $\mu$ M) or Dox (0.1 or 0.5  $\mu$ M) for 24 h and cultured in SA/Dox-free RPMI medium for an additional 24 h. **C** The concentration of IL-6 present in the conditioned medium collected from the bottom wells of a 24-well cell culture plate was determined by ELISA. The upper chamber was plated with control (scramble) or IL-6-silenced (shIL-6-1 and shIL-6-2) A549 cells with and without 20  $\mu$ M SA or 0.1  $\mu$ M Dox treatment for 24 h. Error bars represent mean  $\pm$  SD, n = 3. Statistical analysis was performed using one-way ANOVA with Tukey's multiple comparisons test (A, B) or two-way ANOVA with Tukey's multiple comparisons test (C). \**p*  $\leq$  0.05; \*\**p*  $\leq$  0.01; \*\*\**p*  $\leq$  0.001; ns, not significant.

## Supplementary Tables

**Table S1. IC<sub>50</sub> of SA, Dox, or CisPt under various treatment conditions**

| Figure | Cell line | Treatment | IC <sub>50</sub> of SA (μM) | IC <sub>50</sub> of Dox (μM) | IC <sub>50</sub> of CisPt (μM) |
|--------|-----------|-----------|-----------------------------|------------------------------|--------------------------------|
| 1H, I  | A549      | Scramble  | 256.90 ± 11.75              |                              |                                |
|        |           | shIL-6-1  | 183.03 ± 2.72               |                              |                                |
|        |           | shIL-6-2  | 192.80 ± 14.64              |                              |                                |
| 1J ,K  | A549      | Scramble  |                             | 112.05 ± 25.18               |                                |
|        |           | shIL-6 -1 |                             | 11.60 ± 2.71                 |                                |
|        |           | shIL-6 -2 |                             | 28.09 ± 0.93                 |                                |
| S1L, M | A549      | siCtrl    |                             |                              | 113.09 ± 12.73                 |
|        |           | siIL-6    |                             |                              | 19.27 ± 0.39                   |
| S2B, C | MCF-7     | siCtrl    | 47.45 ± 2.12                |                              |                                |
|        |           | siIL-6    | 23.45 ± 5.06                |                              |                                |
| S2D, E | MCF-7     | siCtrl    |                             | 0.81 ± 0.12                  |                                |
|        |           | siIL-6    |                             | 0.44 ± 0.08                  |                                |
| S2F, G | MCF-7     | siCtrl    |                             |                              | 214.97 ± 11.37                 |
|        |           | siIL-6    |                             |                              | 107.30 ± 3.03                  |
| S2I, J | Hela      | siCtrl    | 70.72 ± 8.53                |                              |                                |
|        |           | siIL-6    | 33.69 ± 3.46                |                              |                                |
| S2K, L | Hela      | siCtrl    |                             | 24.80 ± 7.29                 |                                |
|        |           | siIL-6    |                             | 1.89 ± 0.93                  |                                |
| S2M, N | Hela      | siCtrl    |                             |                              | 62.63 ± 2.60                   |
|        |           | siIL-6    |                             |                              | 32.72 ± 2.82                   |
| S3A, B | A549      | Vehicle   | 254.20 ± 11.37              |                              |                                |
|        |           | IL-6      | 392.87 ± 84.06              |                              |                                |

|        |       |             |                |              |              |
|--------|-------|-------------|----------------|--------------|--------------|
| S3C, D | H1299 | Vehicle     | 17.02 ± 0.76   |              |              |
|        |       | IL-6        | 22.27 ± 2.85   |              |              |
| S3E, F | H1299 | Vehicle     |                |              | 48.67 ± 8.22 |
|        |       | IL-6        |                |              | 76.80 ± 2.73 |
| S3G, H | A549  | siCtrl      | 258.87 ± 12.25 |              |              |
|        |       | siIL-6      | 158.33 ± 11.40 |              |              |
|        |       | siIL-6+IL-6 | 195.57 ± 14.62 |              |              |
| S3I, J | A549  | siCtrl      |                | 93.91 ± 3.66 |              |
|        |       | siIL-6      |                | 2.41 ± 0.29  |              |
|        |       | siIL-6+IL-6 |                | 13.07 ± 0.80 |              |
| 3G, H  | A549  | Vehicle     | 249.40 ± 1.51  |              |              |
|        |       | BAPTA-AM    | 138.00 ± 11.15 |              |              |
| 3N, O  | A549  | Vehicle     | 264.27 ± 9.24  |              |              |
|        |       | LY294002    | 124.73 ± 18.16 |              |              |
| 5M, N  | A549  | siCtrl      | 249.80 ± 21.85 |              |              |
|        |       | si53        | 148.30 ± 6.12  |              |              |
| 6H, I  | A549  | RPMI        | 252.27 ± 11.25 |              |              |
|        |       | Ctrl CM     | 38.30 ± 0.80   |              |              |
|        |       | SA CM       | 60.73 ± 9.76   |              |              |
| 6J, K  | H1299 | RPMI        | 16.82 ± 1.10   |              |              |
|        |       | Ctrl CM     | 11.83 ± 1.19   |              |              |
|        |       | SA CM       | 17.06 ± 2.85   |              |              |

**Table S2. List of primers used for qRT-PCR**

| Target protein | Sequence (5'-3')                 |
|----------------|----------------------------------|
| IL-6           | Forward: AGACAGCCACTCACCTCTTCAG  |
|                | Reverse: TTCTGCCAGTGCCTCTTTGCTG  |
| Panx1          | Forward: CCACGGAGTACGTGTTCTCG    |
|                | Reverse: CCGCCCAGCAATATGAATCC    |
| Bcl-2          | Forward: ATGTGTGTGGAGAGCGTCAA    |
|                | Reverse: ACAGTTCCACAAAGGCATCC    |
| Bcl-xL         | Forward: GAGCTGGTGGTTGACTTTCTC   |
|                | Reverse: TCCATCTCCGATTCAGTCCCT   |
| Mcl-1          | Forward: TAAGGACAAAACGGGACTGG    |
|                | Reverse: ACCAGCTCCTACTCCAGCAA    |
| p53            | Forward: AAGGAAATTTGCGTGTGGAGT   |
|                | Reverse: AAAGCTGTTCCGTCCCAGTA    |
| CD206          | Forward: GGGAAAGGTTACCCTGGTGG    |
|                | Reverse: GTCAAGGAAGGGTCGGATCG    |
| CD163          | Forward: TTTGTCAACTTGAGTCCCTTCAC |
|                | Reverse: TCCCGCTACACTTGTTTTAC    |
| CCL18          | Forward: TGGCAG ATTCCACAAAAGTTCA |
|                | Reverse: GGATGACACCTGGCTTGGG     |
| CD80           | Forward: GGCCCGAGTACAAGAACCG     |
|                | Reverse: TCGTATGTGCCCTCGTCAGAT   |
| CXCL10         | Forward: TGTACGCTGTACCTGCATCA    |
|                | Reverse: GGACAAAATTGGCTTGCAGGA   |



|               |                                    |
|---------------|------------------------------------|
| IL-1 $\beta$  | Forward: CTCGCCAGTGAAATGATGGCT     |
|               | Reverse: GTCGGAGATTCGTAGCTGGAT     |
| CD14          | Forward: CTGCAACTTCTCCGAACCTC      |
|               | Reverse: CCAGTAGCTGAGCAGGAACC      |
| CD68          | Forward: CTTCTCTCATTCCCCTATGGACA   |
|               | Reverse: GAAGGACACATTGTACTIONCCACC |
| TNF- $\alpha$ | Forward: TTCTGCCTGCTGCACTTTGGA     |
|               | Reverse: TTGATGGCAGAGAGGAGGTTG     |
| UBC           | Forward: CTGGAAGATGGTCGTACCCTG     |
|               | Reverse: GGTCTTGCCAGTGAGTGTCT      |
| GAPDH         | Forward: TGCACCACCAACTGCTTAGC      |
|               | Reverse: GGCATGGACTGTGGTCATGAG     |

**Table S3. shRNA sequences**

| <b>shRNA name</b> | <b>Clone ID</b> | <b>Oligo sequence (5'-3')</b>                                  |
|-------------------|-----------------|----------------------------------------------------------------|
| Scramble          | ASN0000000004   | CCGGCCTAAGGTTAAGTCGCCCTCGCTCGAGCGA<br>GGGCGACTTAACCTTAGGTTTTT  |
| shIL-6-1          | TRCN0000059207  | CCGGCAGAACGAATTGACAAACAAACTCGAGTTT<br>GTTTGTCAATTCGTTCTGTTTTTG |
| shIL-6-2          | TRCN0000059206  | CCGGGACATGTAACAAGAGTAACATCTCGAGATG<br>TACTCTTGTTACATGTCTTTTTG  |

**Table S4. siRNA sequences**

| Target protein | siRNA ID  | Target sequence (5'-3')              |
|----------------|-----------|--------------------------------------|
| p53            | VHS40366  | Sense: CCAUCCACUACAACUACAUGUGUAA     |
|                |           | Antisense: UUACACAUGUAGUUGUAGUGGAUGG |
| Caspase-2      | HSS141454 | Sense: UGCACGUGGCCGACAUGCUGGUUAA     |
|                |           | Antisense: UUAACCAGCAUGUCGGCCACGUGCA |
| IL-6           | s7311     | Sense: GAACGAAUUGACAAACAAAtt         |
|                |           | Antisense: UUUGUUUGUCAAUUCGUUCtg     |

**Table S5. List of primers used for ChIP-qPCR**

| Gene locus                 | Target region                 | Sequence (5'-3')                |
|----------------------------|-------------------------------|---------------------------------|
| PANX1                      | ChIP 1<br>(-1911 to -1768)    | Forward: GGGAGAATTTACAAAGGGACC  |
|                            |                               | Reverse: CTTCCACCCAAAACACTCC    |
|                            | ChIP 2<br>(-1441 to -1329)    | Forward: TGGTTATGGCAGCTGTGAGA   |
|                            |                               | Reverse: CCTGAACTCCATCTTCCCA    |
|                            | ChIP 3<br>(-1277 to -1169)    | Forward: TATGAGCCATCTACGCGGAG   |
|                            |                               | Reverse: GGGTCCACAGATACAAGCCT   |
|                            | ChIP 4<br>(-817 to -652)      | Forward: CCTGTGTACCATACCCTCCG   |
|                            |                               | Reverse: GGAAGCTAAATGTGAGGATCCA |
|                            | ChIP 5<br>(-622 to -488)      | Forward: CCTTAATTTCCGTGGACACTGG |
|                            |                               | Reverse: GAGCCAGCAGAGAGAGGG     |
|                            | ChIP 6<br>(-218 to -119)      | Forward: GCCATCCCATCCACAGAAAG   |
|                            |                               | Reverse: GAAATTCTCCCGTCCCTCCC   |
| 3'-UTR<br>(+2675 to +2791) | Forward: TGCTTCATATGGCGTGCTTG |                                 |
|                            | Reverse: CCAAATGGCCTCAATTCGGA |                                 |
| CDKN1A                     | -2292 to -2169                | Forward: GGCTCTGATTGGCTTTCTGG   |
|                            |                               | Reverse: TCCTACCATCCCCTTCCTCA   |
