# Supplementary material for: Tumor suppressor p53 mediates interleukin-6 expression to enable cancer cell evasion of genotoxic stress
Source: PubMed Central journal article supplement (PMC10495329; doi:10.1038/s41420-023-01638-0), 2023-09-11

**Fig. 1G**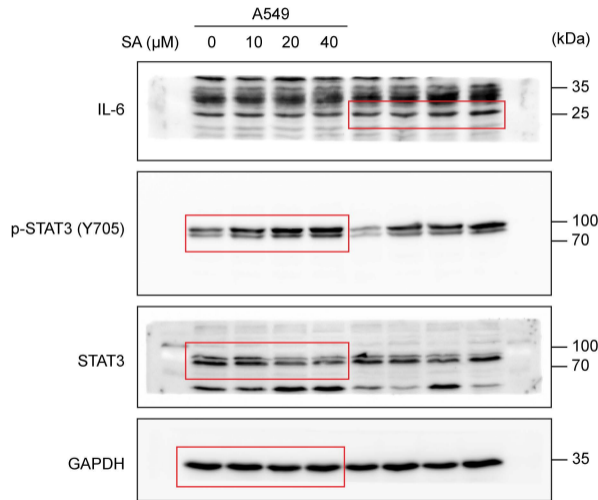**Fig. 1L**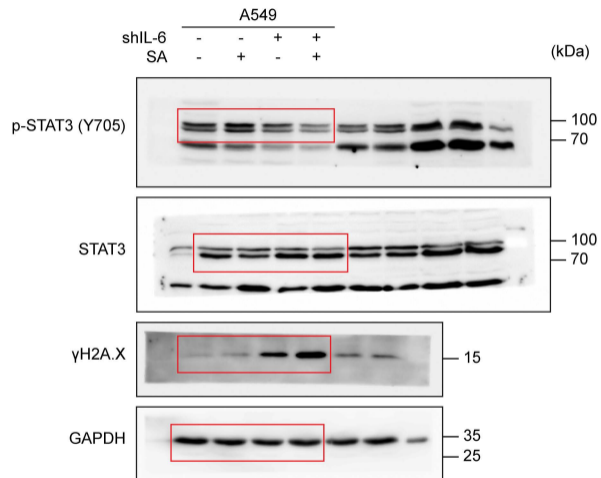

**Fig. 3J**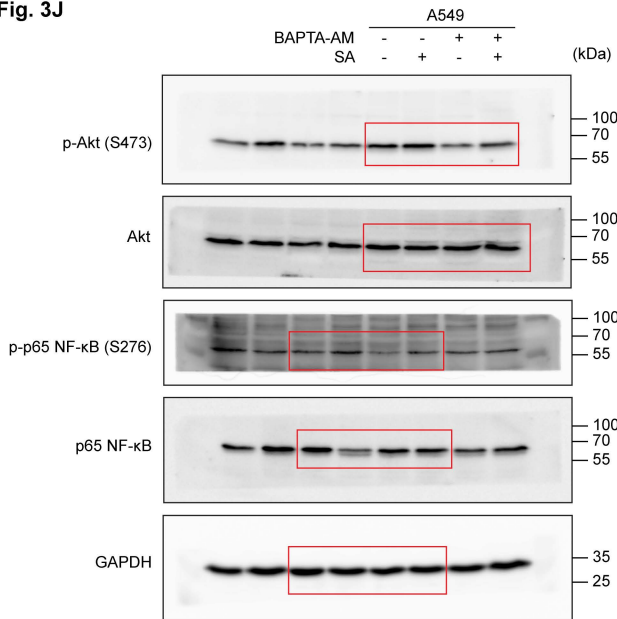**Fig. 3M**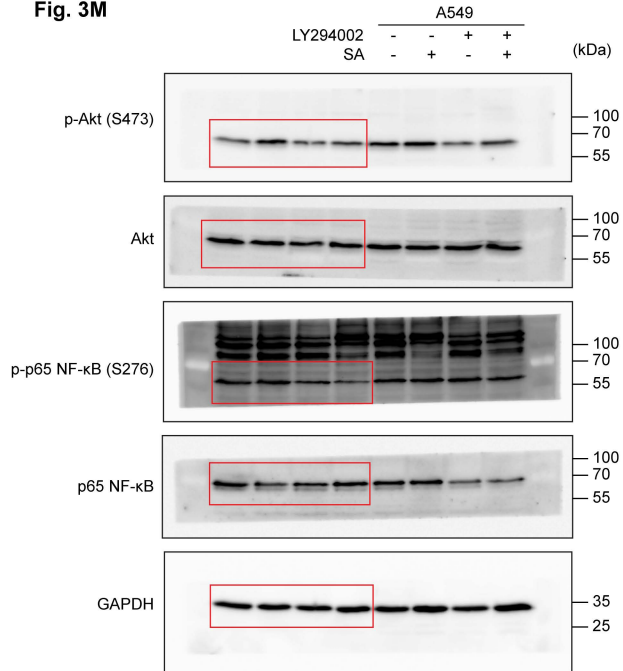

**Fig. 4C**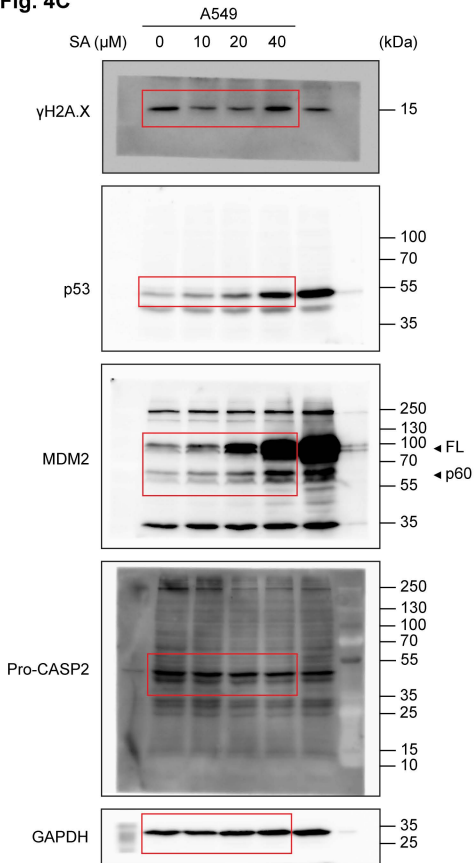**Fig. 4G**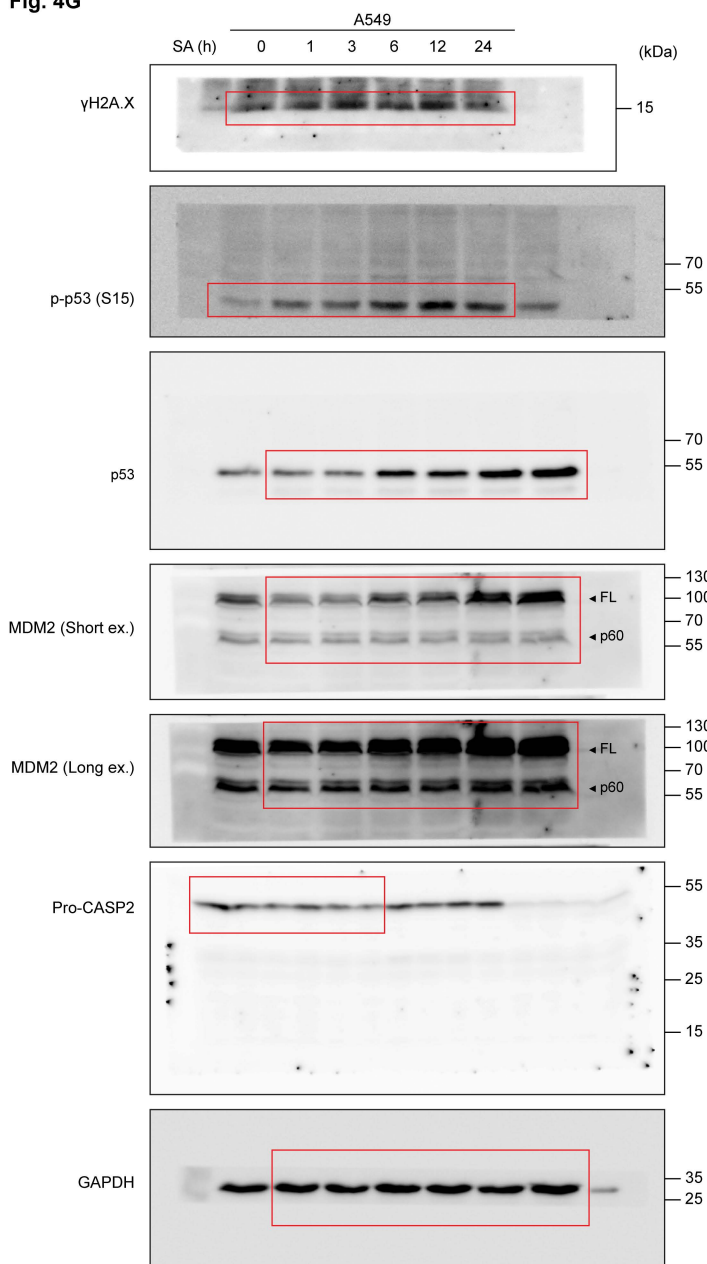**Fig. 4D**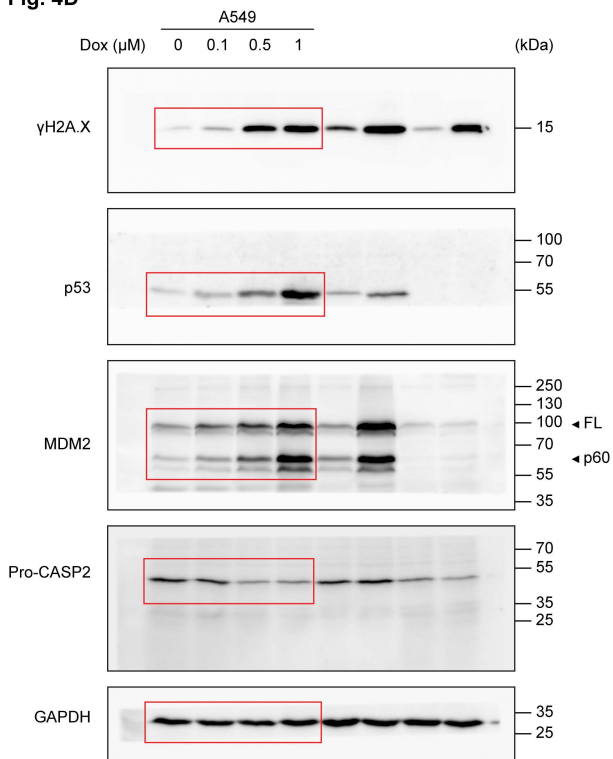

**Fig. 4H**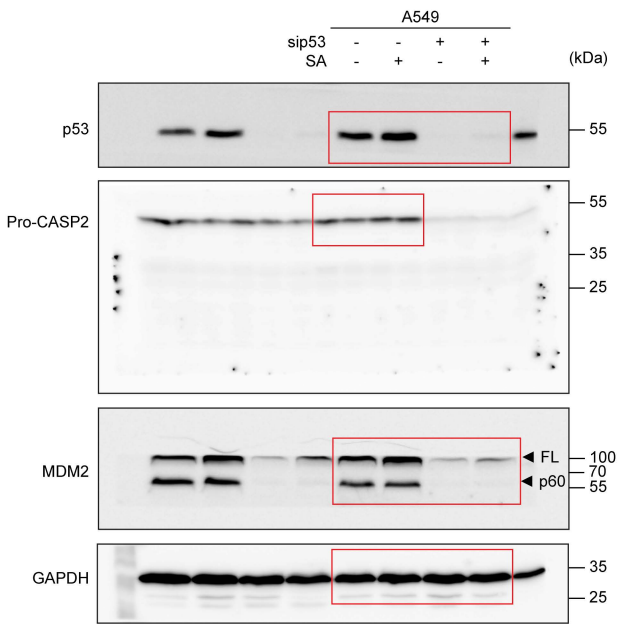**Fig. 4I**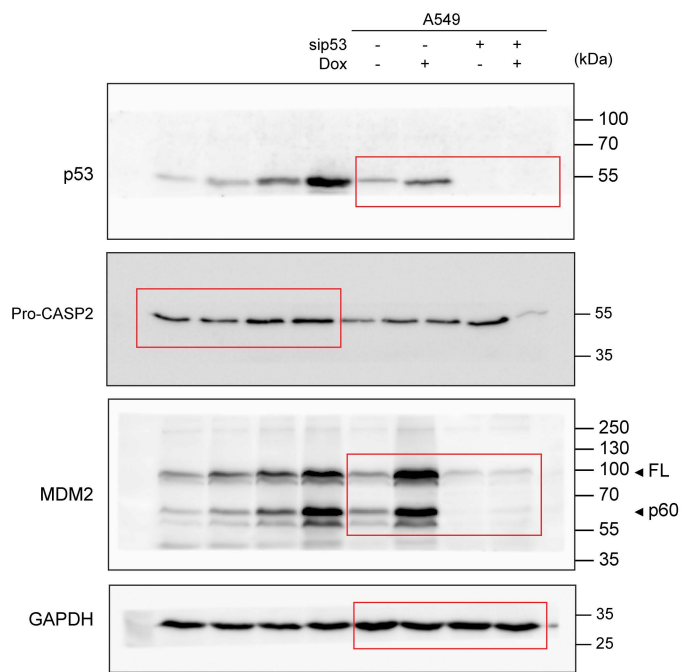**Fig. 4K**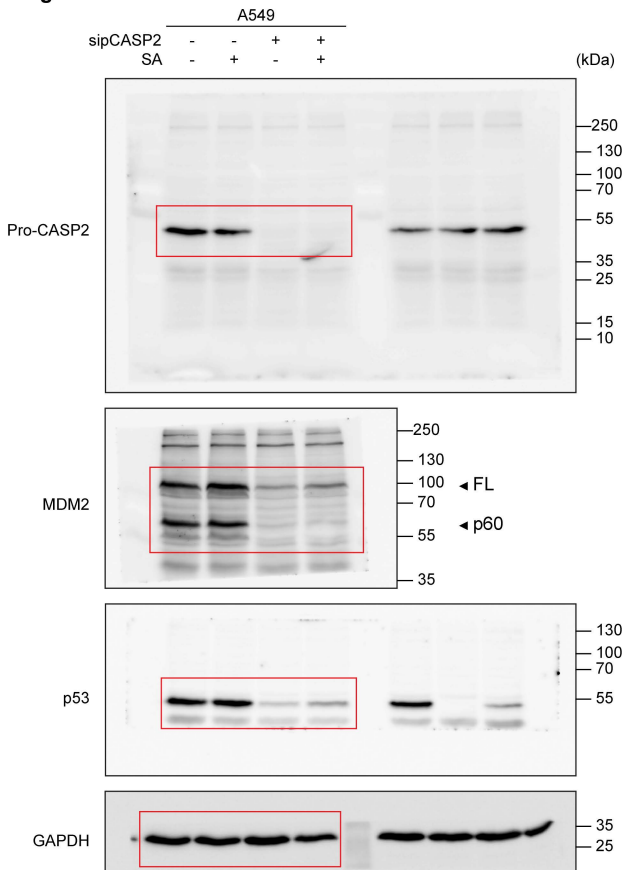**Fig. 4L**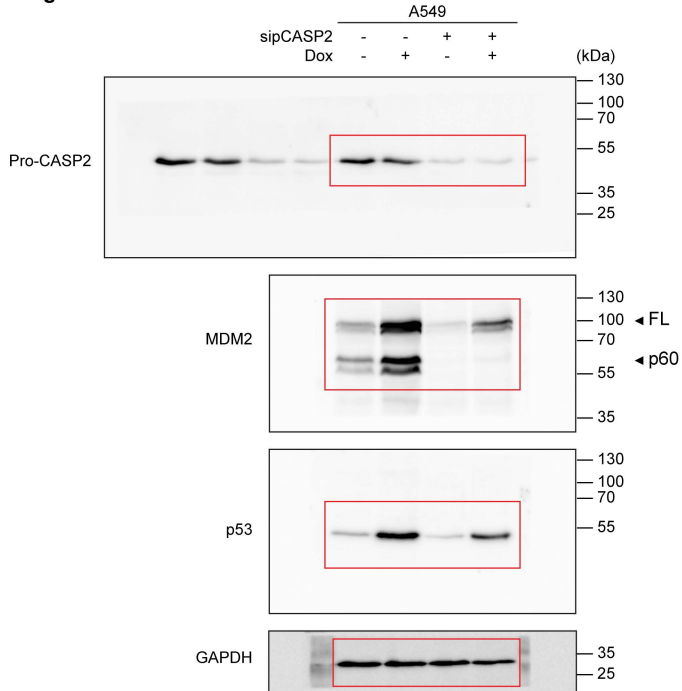

**Fig. 5D**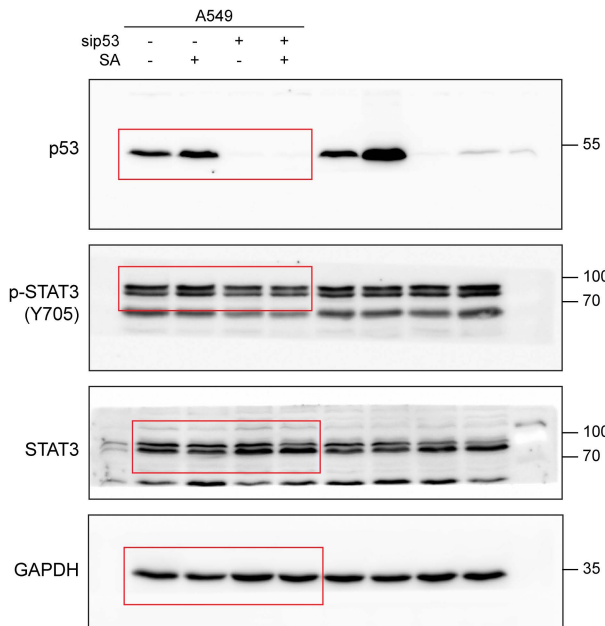**Fig. 5L**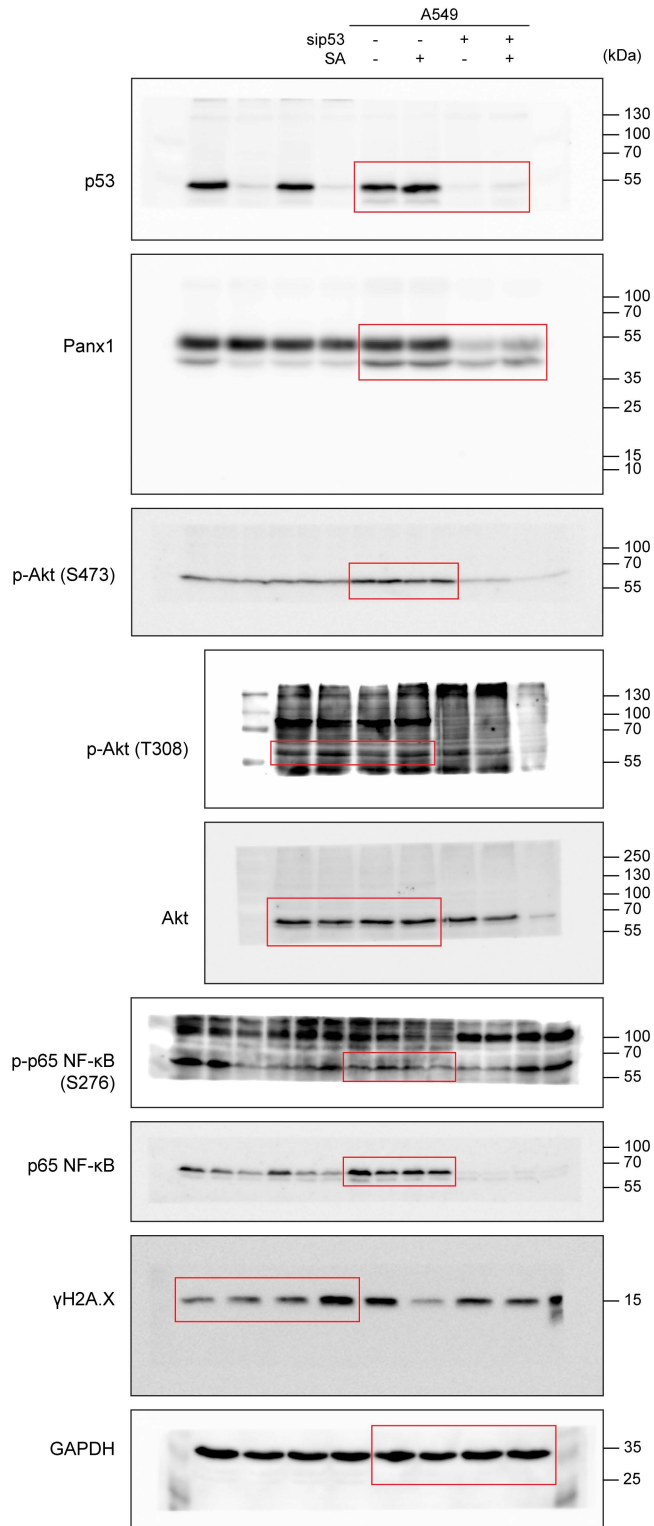**Fig. 5G**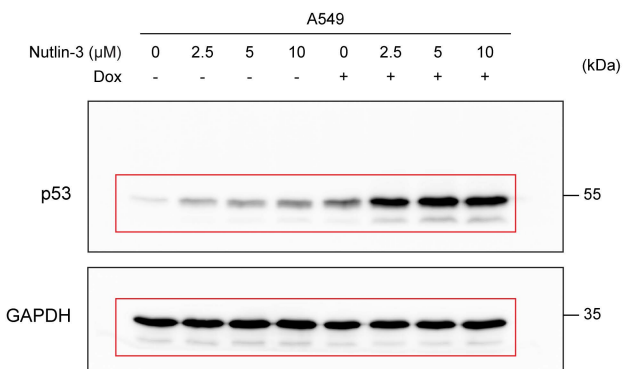

Supplement: 41420_2023_1638_MOESM8_ESM.pdf [file 41420_2023_1638_MOESM8_ESM.pdf]
